# Supplementary material for: The Use of Recycled Polymers for the Preparation of the Self-Reinforced Composites by Overmolding Technique: Materials Performance Evaluation
Source: Preprints.org preprint supplement (doi:10.20944/preprints202306.1599.v1), 2023-06-22
Supplement: Supplementary file 3 [file supplementary]

Supplementary information

The use of polycarbonate-based blends for overmolding of the self-reinforced prepregs: materials performance evaluation.

Jacek Andrzejewski1*

1 Institute of Materials Technology, Faculty of Mechanical Engineering, Poznan University of Technology, ul. Piotrowo 3, 61-138 Poznan, Poland; (J.A.) jacek.andrzejewski@put.poznan.pl


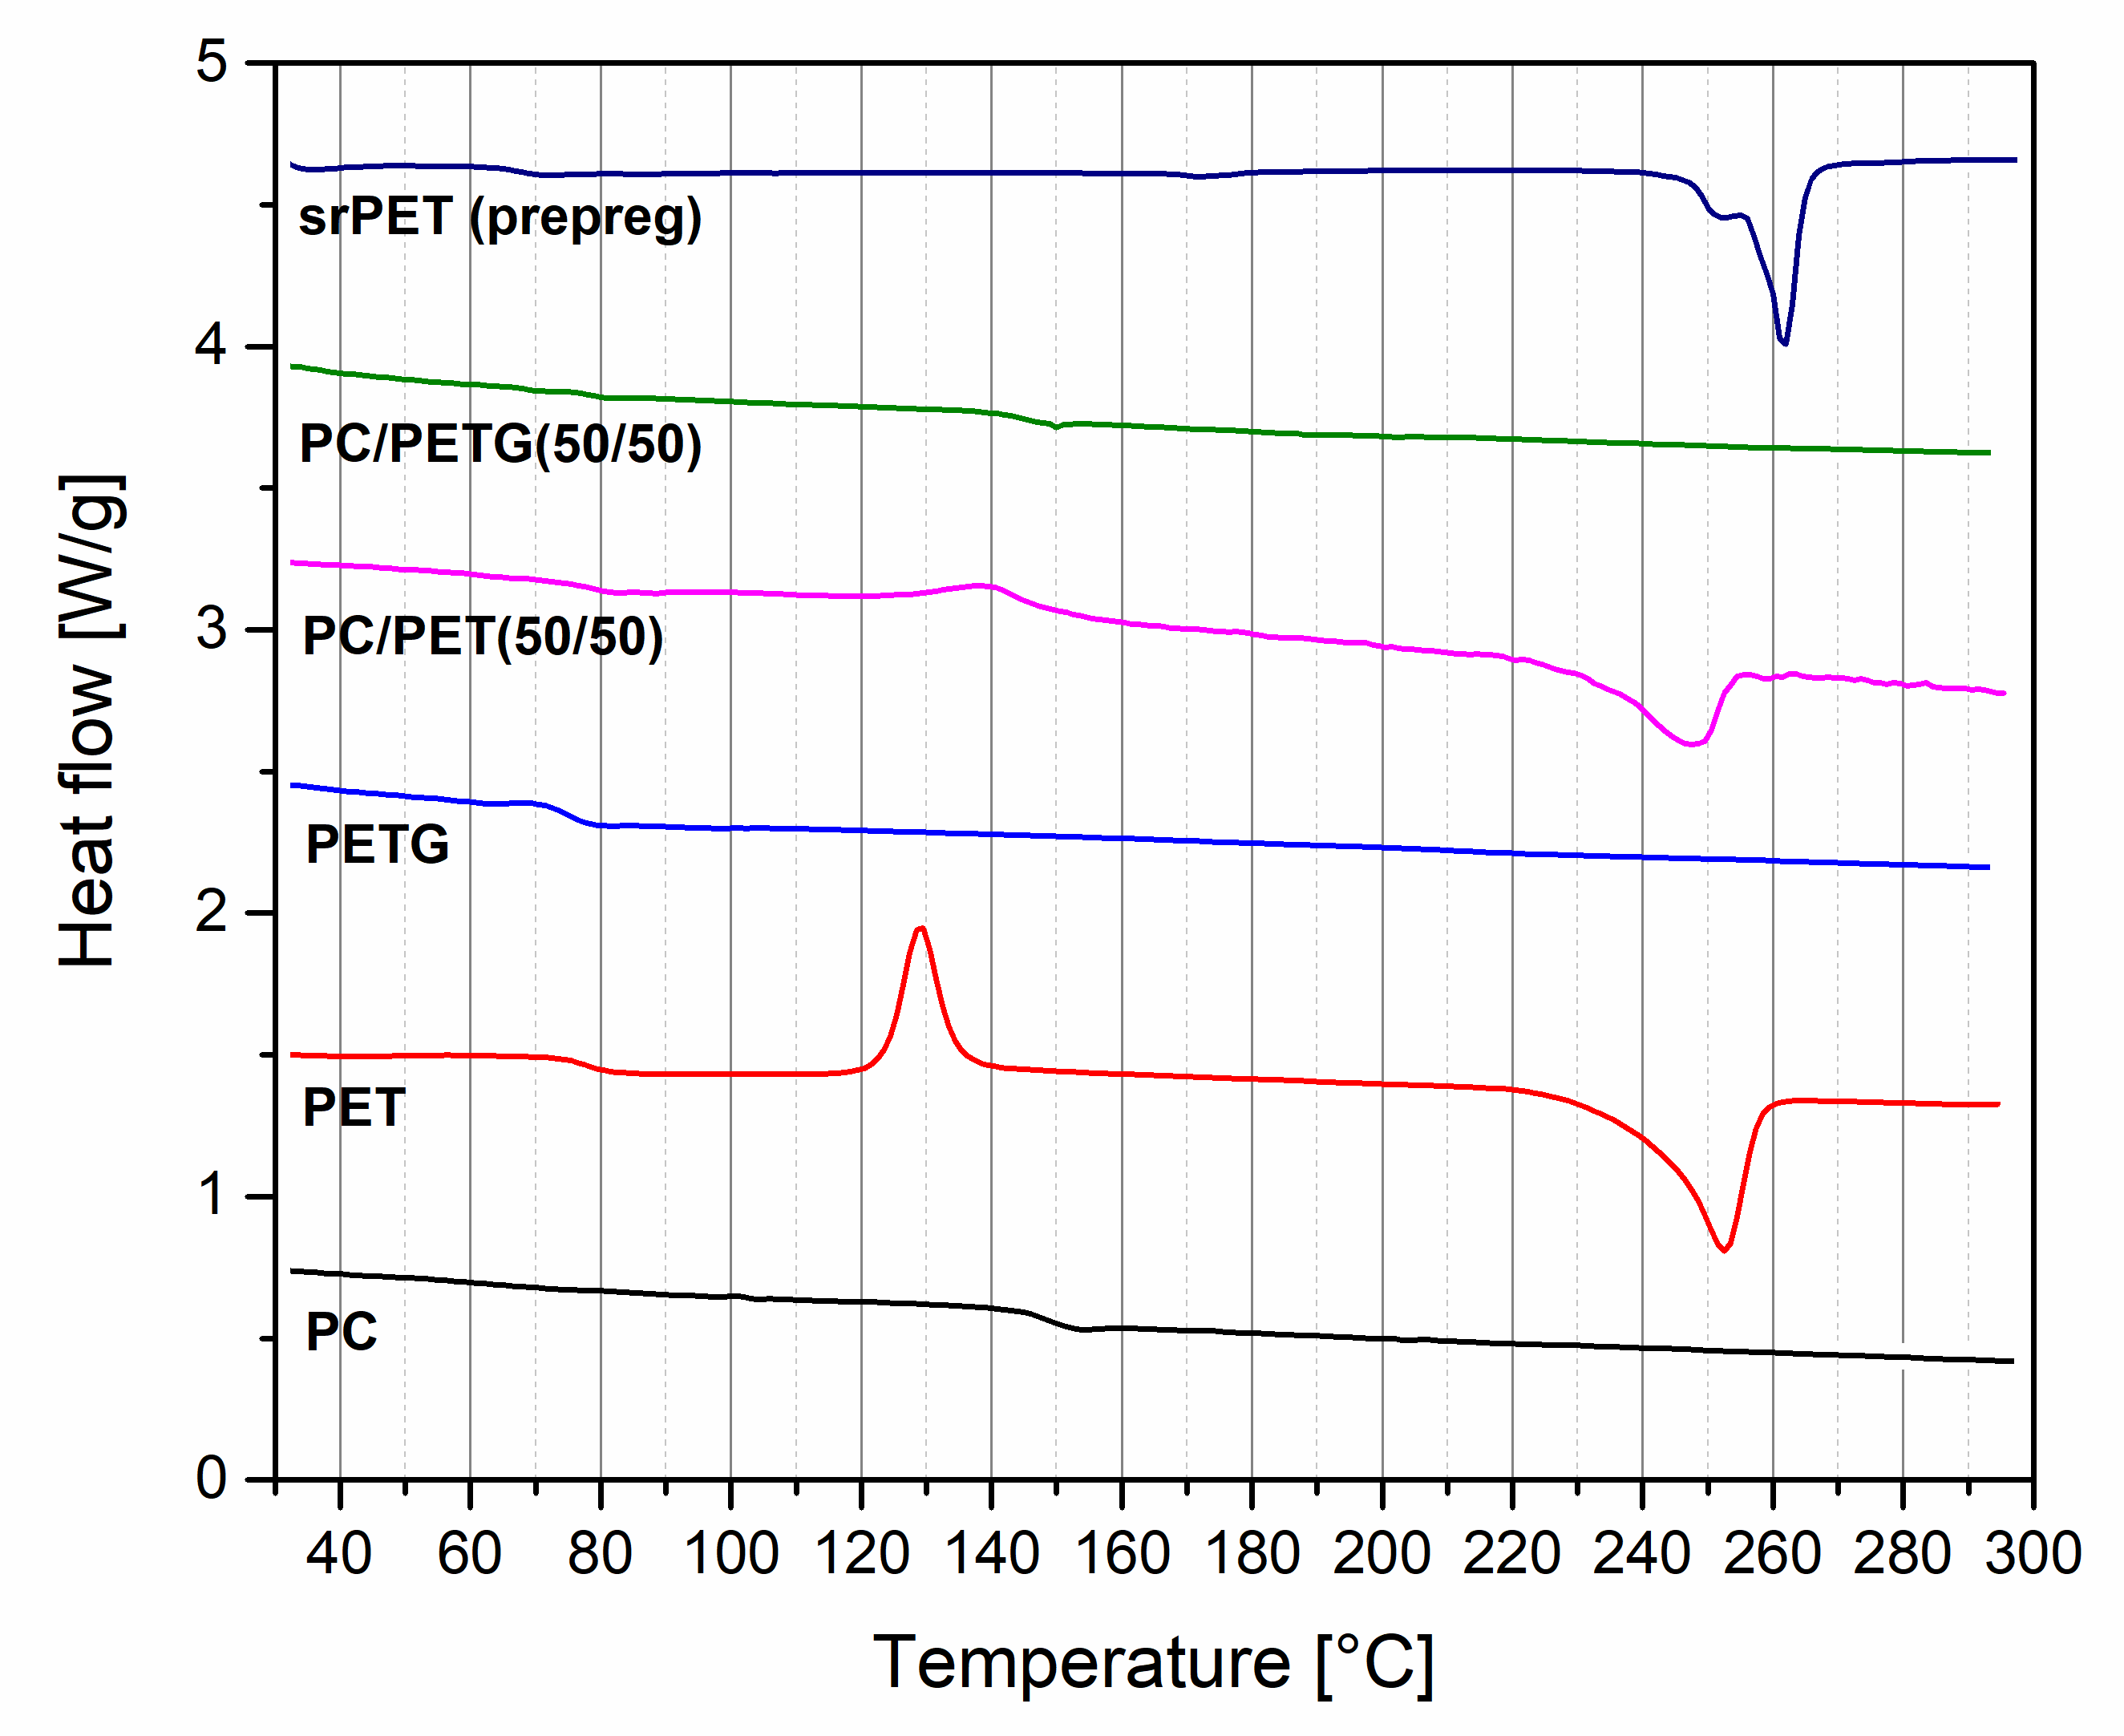


Fig. S1. The DSC 1st heating stage thermograms for overmolded materials and srPET prepreg.


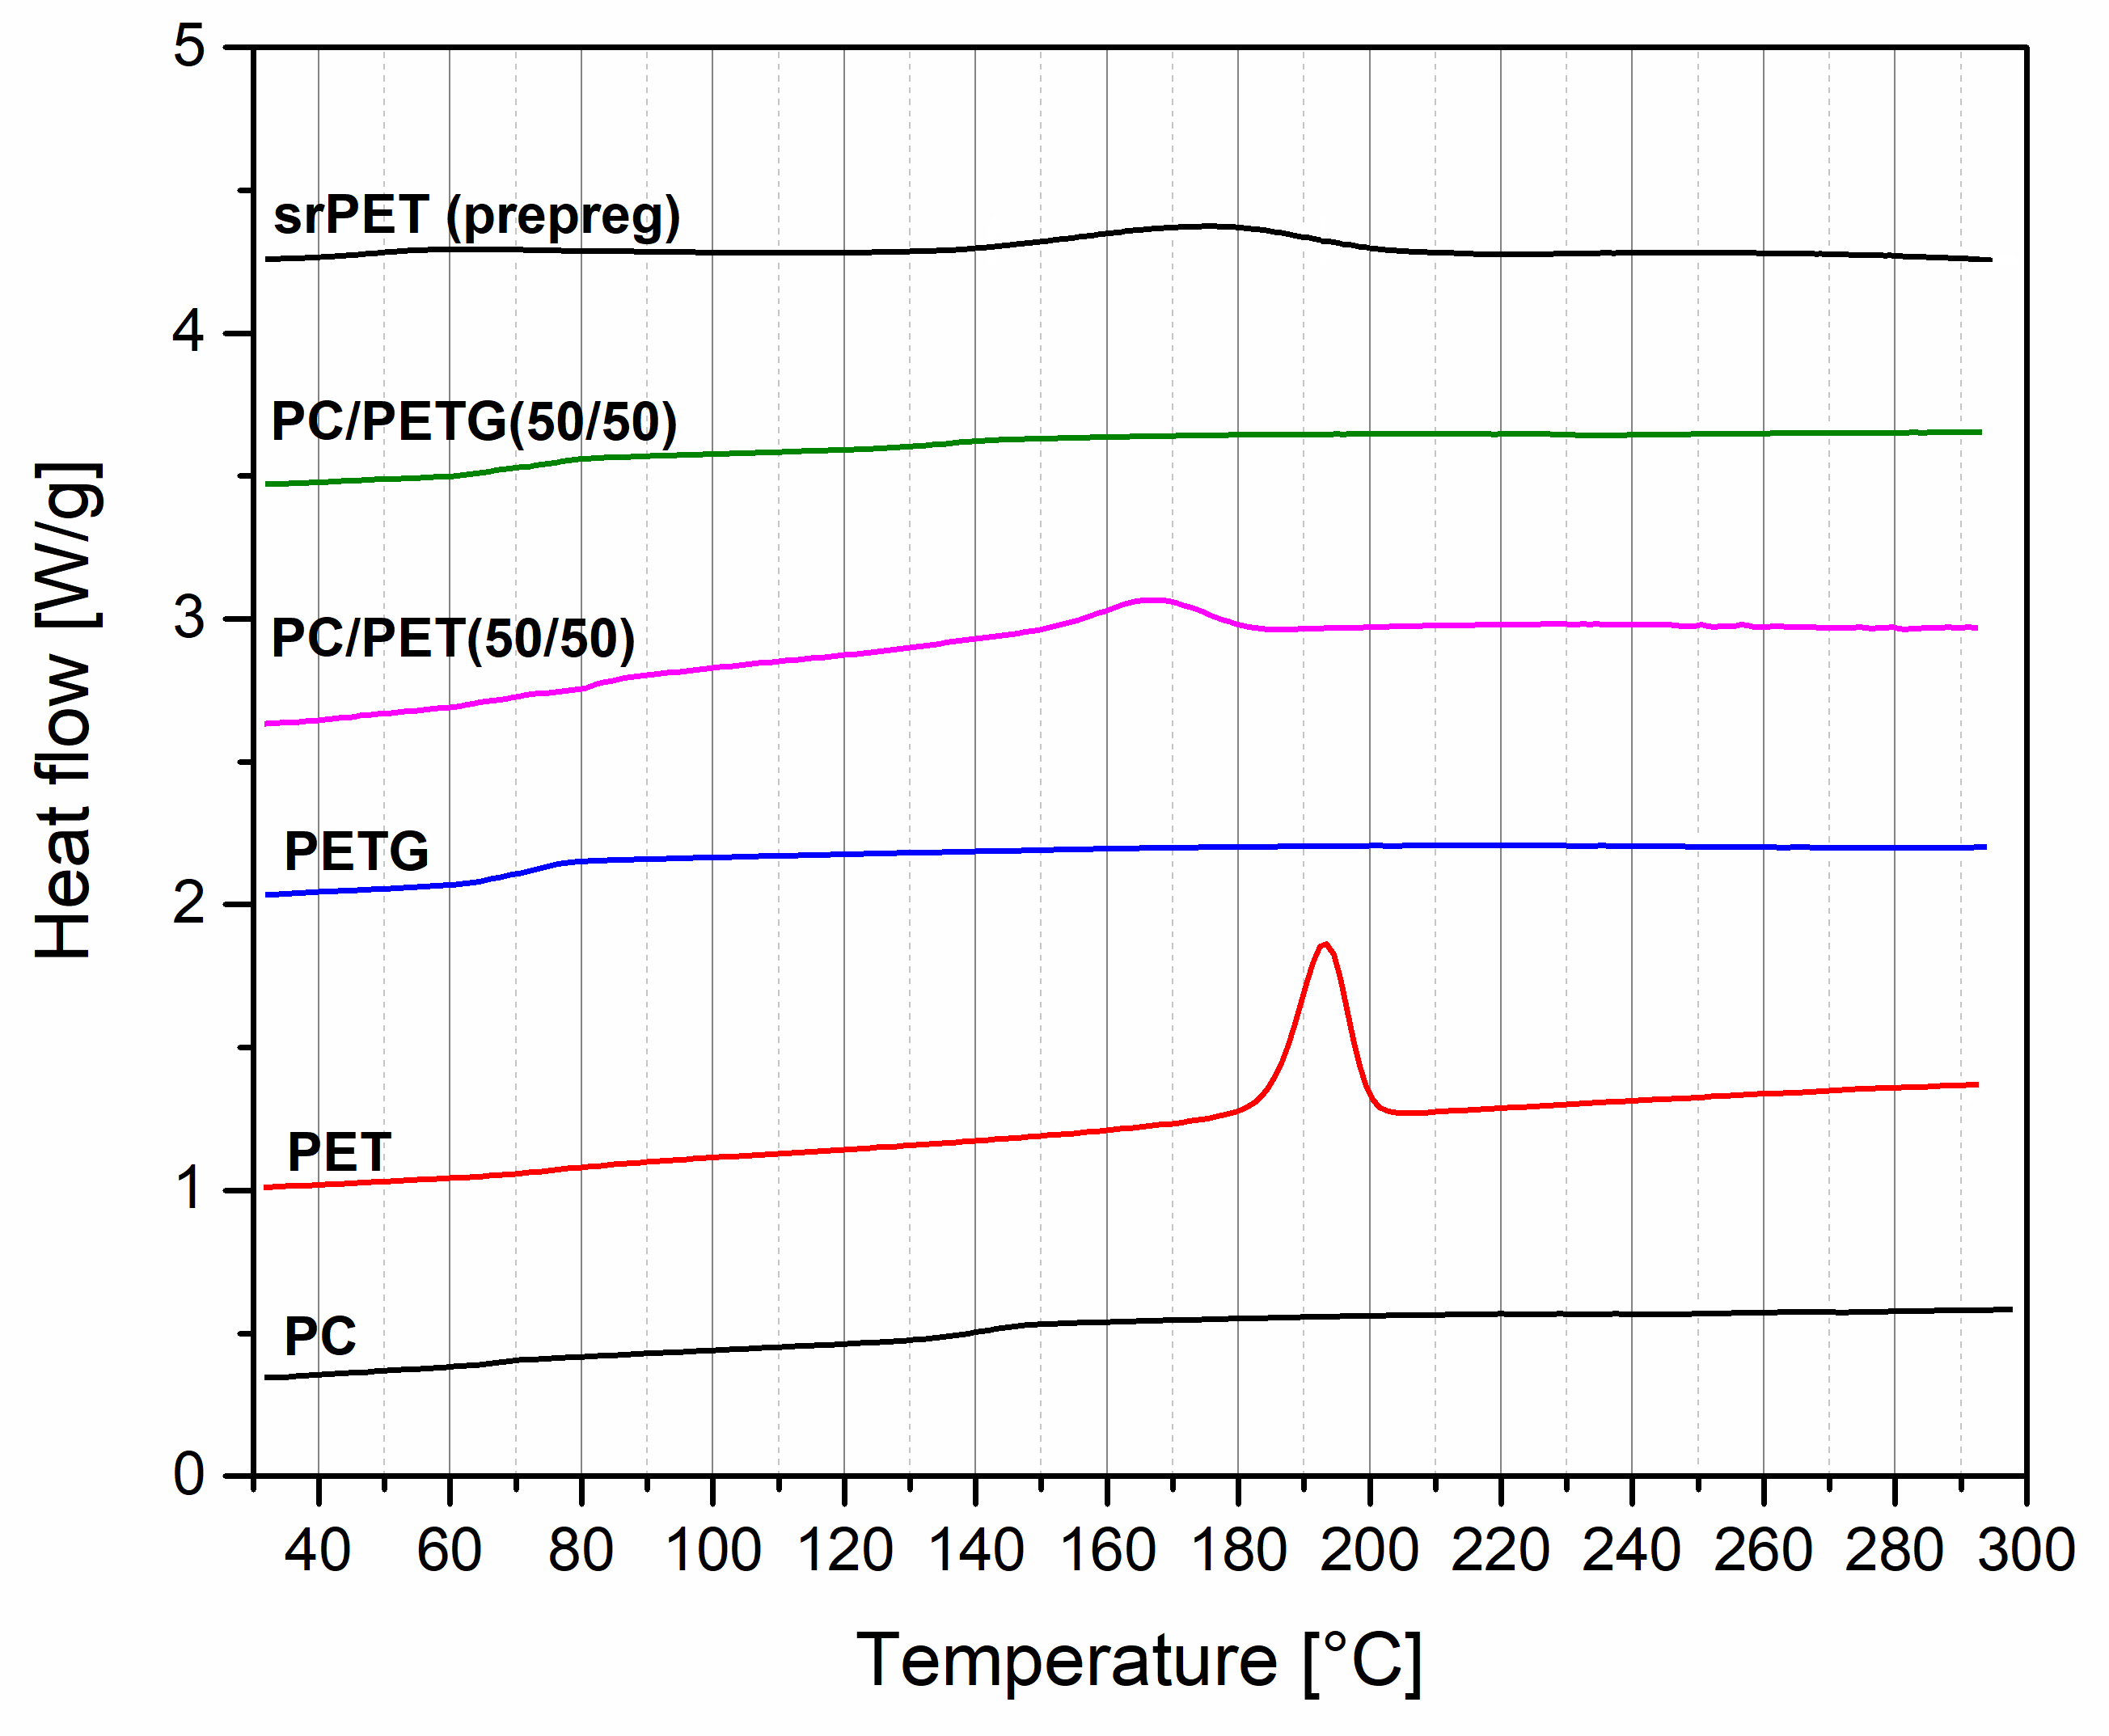


Fig. S2. The DSC cooling stage thermograms for overmolded materials and srPET prepreg.


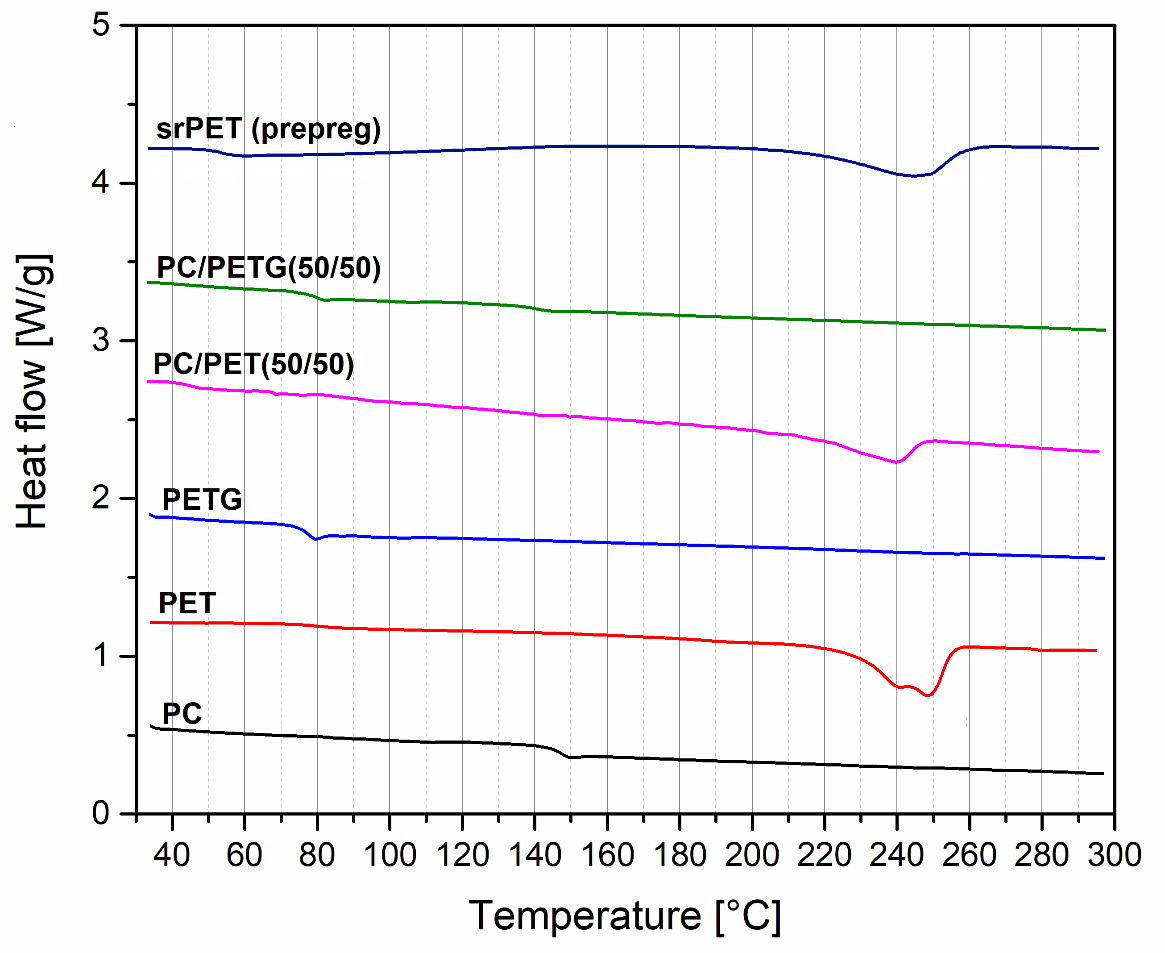


Fig. S2. The DSC 2nd stage heating thermograms for overmolded materials and srPET prepreg.
